# Supplementary material for: Matrix Metalloproteinases Inhibition by Doxycycline Rescues Extracellular Matrix Organization and Partly Reverts Myofibroblast Differentiation in Hypermobile Ehlers-Danlos Syndrome Dermal Fibroblasts: A Potential Therapeutic Target?
Source: Cells. 2021 Nov 19;10(11):3236. doi: 10.3390/cells10113236 (PMC8621259; doi:10.3390/cells10113236)
Supplement: Supplementary file 1 [file cells-10-03236-s001.zip]

Archive with 5 entries (5 files):
- cells-1462620 - Supplementary Figures 1-3.pdf
- Table S1.xlsx
- Table S2.xlsx
- Table S3.xlsx
- Table S4.xlsx
