# Supplementary material for: Matrix Metalloproteinases Inhibition by Doxycycline Rescues Extracellular Matrix Organization and Partly Reverts Myofibroblast Differentiation in Hypermobile Ehlers-Danlos Syndrome Dermal Fibroblasts: A Potential Therapeutic Target?
Source: Cells. 2021 Nov 19;10(11):3236. doi: 10.3390/cells10113236 (PMC8621259; doi:10.3390/cells10113236)
Supplement: Supplementary file 1 [file cells-10-03236-s001.zip › Table S1.xlsx]

## Sheet: Table S1
ID Chiarelli et al., 2021 PMID: 33383104	SEX	Other affected family members	Age at skin biopsy	Age at last clinical evaluation	BEIGHTON SCORE	2017 NOSOLOGY	≥6 for pre-pubertal children and adolescents, ≥5 for pubertal men and women up to the age of 50, and ≥4 for those >50 years of age	Unusually soft or velvety skin	Mild skin hyperextensibility (>1.5 cm)	striae distensae or rubrae	Bilateral piezogenic papules of the heel	Recurrent or multiple abdominal hernia(s) (e.g. umbilical, inguinal, crural)	Atrophic scarring involving at least 2 sites without the formation of truly papyraceous/hemosideric scars	Pelvic floor, rectal, and/or uterine prolapse in children, men or nulliparous women without a history of morbid obesity or other known predisposing medical condition	Dental crowding and high or narrow palate	Arachnodactyly	Arm span-to-height ≥1.05	Mitral valve prolapse (MVP)	Aortic root dilatation with Z-score > +2	5 or more features present	Positive family history, with one or more first degree relatives meeting the current diagnostic criteria	Musculoskeletal pain in two or more limbs, recurring daily for at least 3 months	Chronic, widespread pain for ≥3 months	Recurrent joint dislocations or frank joint instability, in the absence of trauma	FOR A POSITIVE CRETERION 2: Two or More Among the Features (A–C) MUST Be Present (A and B; A and C; B and C; A and B and C)				Absence of unusual skin fragility	Exclusion of other heritable and acquired connective tissue disorders	Exclusion of alternative diagnoses that may also include joint hypermobility by means of hypotonia and/or connective tissue laxity	Mildly hyperextensible skin	Velvety/silky/soft skin texture	Striae distensae or rubrae in young age	Small or post-surgical atrophic scars	Keratosis pilaris	Inguinal/umbilical/incisional hernia	light blue sclerae	Easy bruising	Xerosis/xeroftalmia	Gingival inflammation/recessions	Resistance to local anaesthetic drugs	Uvula abnormalities	Generalized joint hypermobility	Historical joint hypermobility	Recurrent dislocations/sprains	Severe chronic generalized (≥ 4 joint) pain (≥7 NRS11 PAIN RATING SCALE)	Recurrent inflammatory soft-tissue lesions	Temporomandibular joint dysfunction
							CRITERION 1	CRITERION 2 [Feature A] (must have at least 5)												[Feature A]	[Feature B]	[Feature C] (must have at least one)			A+B	A+C	B+C	A+B+C	CRITERION 3 (all must be met)			MUCOCUTANEOUS SIGNS												OSTEOARTICULAR SIGNS
P1	F	1	34	38	6	+	+	+	+	+	+	-	+	+	+	-	-	+	-	+	+	-	+	+	+	+	+	+	+	+	+	+	+	+	+	-	-	+	+	+	+	+	-	+	+	+	+	+	+
P2	F	2	49	52	5	+	+	+	+	+	+	-	+	-	+	-	-	+	-	+	+	-	+	+	+	+	+	+	+	+	+	+	+	+	+	-	-	+	+	+	+	+	+	+	+	+	+	+	+
P3	F	2	36	41	5	+	+	+	+	+	+	-	+	+	+	-	-	-	-	+	+	-	+	+	+	+	+	+	+	+	+	+	+	+	+	-	-	+	+	+	+	-	-	+	+	+	+	+	+
P4	F	2	53	56	5	+	+	+	+	-	+	-	+	+	+	-	-	-	-	+	+	-	+	+	+	+	+	+	+	+	+	+	+	-	+	-	-	-	+	+	+	+	+	+	+	+	+	-	+
P5	F	-	38	38	5	+	+	+	+	+	+	-	-	+	-	+	-	-	-	+	-	-	-	+	-	+	-	-	+	+	+	+	+	+	+	-	-	-	+	-	+	+	+	+	+	+	-	-	+
P6	F	-	54	54	5	+	+	+	+	+	+	-	+	-	+	-	-	+	-	+	-	-	+	+	-	+	-	-	+	+	+	+	+	+	+	-	-	+	+	-	+	-	+	+	+	+	+	+	-
[truncated: 68 more columns]
