# Supplementary material for: Matrix Metalloproteinases Inhibition by Doxycycline Rescues Extracellular Matrix Organization and Partly Reverts Myofibroblast Differentiation in Hypermobile Ehlers-Danlos Syndrome Dermal Fibroblasts: A Potential Therapeutic Target?
Source: Cells. 2021 Nov 19;10(11):3236. doi: 10.3390/cells10113236 (PMC8621259; doi:10.3390/cells10113236)
Supplement: Supplementary file 1 [file cells-10-03236-s001.zip › Table S2.xlsx]

## Sheet: All proteins
Table S2: Full list of proteins identified in control and hEDS secretome by LC-MS/MS
Gene names	Protein description
A2M	Alpha-2-macroglobulin
ABCA13	ATP-binding cassette sub-family A member 13
ABHD14B	Alpha/beta hydrolase domain-containing protein 14B
ABI3BP	Target of Nesh-SH3
ABRACL	Costars family protein ABRACL
ACAN	Aggrecan core protein
ACLY	ATP-citrate synthase
ACTA1	Actin, alpha skeletal muscle
ACTBL2	Beta-actin-like protein 2
ACTG1	Actin, cytoplasmic 2
ACTG1	Actin, cytoplasmic 2
ACTN1	Alpha-actinin-1
ACTN4	Alpha-actinin-4
ACTR3	Actin-related protein 3
ACVR1B	Activin receptor type-1B
ADAM10	Disintegrin and metalloproteinase domain-containing protein 10
ADAM9	Disintegrin and metalloproteinase domain-containing protein 9
ADAMTS5	A disintegrin and metalloproteinase with thrombospondin motifs 5
ADAMTSL1	ADAMTS-like protein 1
ADM	ADM
ADPRHL2	Poly(ADP-ribose) glycohydrolase ARH3
AEBP1	Adipocyte enhancer-binding protein 1
AGRN	Agrin
AGT	Angiotensinogen
AHNAK	Neuroblast differentiation-associated protein AHNAK
AK1	Adenylate kinase isoenzyme 1
AKAP12	A-kinase anchor protein 12
AKR1A1	Alcohol dehydrogenase [NADP(+)]
AKR1B1	Aldose reductase
AKR1C1	Aldo-keto reductase family 1 member C3
ALCAM	CD166 antigen
ALDOA	Fructose-bisphosphate aldolase A
ALDOC	Fructose-bisphosphate aldolase C
ANPEP	Aminopeptidase N
ANTXR1	Anthrax toxin receptor 1
ANXA1	Annexin A1
ANXA2	Annexin A2
ANXA5	Annexin A5
ANXA6	Annexin
AP2A1	AP-2 complex subunit alpha-1
APEX1	DNA-(apurinic or apyrimidinic site) lyase
APLP2	Amyloid-like protein 2
APOB	Apolipoprotein B-100
APP	Amyloid beta A4 protein
ARCN1	Coatomer subunit delta
ARHGDIA	Rho GDP-dissociation inhibitor 1
ARMC5	Armadillo repeat-containing protein 5
ARPC1A	Actin-related protein 2/3 complex subunit 1A
ARPC1B	Actin-related protein 2/3 complex subunit 1B
ARPC2	Actin-related protein 2/3 complex subunit 2
ARPC4-TTLL3	Actin-related protein 2/3 complex subunit 4
ARPC5	Actin-related protein 2/3 complex subunit 5
ARSA	Arylsulfatase A
ARSB	Arylsulfatase B
ATP5B	ATP synthase subunit beta
ATP6AP1	V-type proton ATPase subunit S1
ATRN	Attractin
AXL	Tyrosine-protein kinase receptor UFO
B2M	Beta-2-microglobulin
B4GALT1	Beta-1,4-galactosyltransferase 1
B4GALT5	Beta-1,4-galactosyltransferase 5
B4GAT1	Beta-1,4-glucuronyltransferase 1
BAG2	BAG family molecular chaperone regulator 2
BGN	Biglycan
BMP1	Bone morphogenetic protein 1
BRWD3	Bromodomain and WD repeat-containing protein 3
BST1	ADP-ribosyl cyclase/cyclic ADP-ribose hydrolase 2
BTD	Biotinidase
C1orf123	UPF0587 protein C1orf123
C1R	Complement C1r subcomponent
C1S	Complement C1s subcomponent
C3	Complement C3
C4B	Complement C4-A
C6	Complement component C6
CALD1	Caldesmon
CALM2	Calmodulin 2
CALR	Calreticulin
CALU	Calumenin
CAP1	Adenylyl cyclase-associated protein
CAPZA2	F-actin-capping protein subunit alpha-2
CARD14	Caspase recruitment domain-containing protein 14
CASP14	Caspase-14
CBR1	Carbonyl reductase [NADPH] 1
CBR3	Carbonyl reductase [NADPH] 3
CCDC122	Coiled-coil domain-containing protein 122
CCDC80	Coiled-coil domain-containing protein 80
CCT2	T-complex protein 1 subunit beta
CCT8	T-complex protein 1 subunit theta
CD109	CD109 antigen
CD248	Endosialin
CD44	CD44 antigen
CD59	CD59 glycoprotein
CD81	Tetraspanin
CDH11	Cadherin-11
CDH13	Cadherin-13
CDH2	Cadherin-2
CDH6	Cadherin-6
CEMIP	Cell migration-inducing and hyaluronan-binding protein
CFB	Complement factor B
CFD	Complement factor D
CFL1	Cofilin-1
CFL2	Cofilin-2
CHI3L1	Chitinase-3-like protein 1
CHIA	Acidic mammalian chitinase
CKM	Creatine kinase M-type
CLEC11A	C-type lectin domain family 11 member A
CLEC3B	Tetranectin
CLIC1	Chloride intracellular channel protein 1
CLIC4	Chloride intracellular channel protein 4
CLSTN1	Calsyntenin-1
CLTC	Clathrin heavy chain
CLU	Clusterin
CMPK1	UMP-CMP kinase
CNDP2	Cytosolic non-specific dipeptidase
CNPY2	Protein canopy homolog 2
CNTN3	Contactin-3
COL11A1	Collagen alpha-1(XI) chain
COL12A1	Collagen alpha-1(XII) chain
COL15A1	Collagen alpha-1(XV) chain
COL1A1	Collagen alpha-1(I) chain
COL1A2	Collagen alpha-2(I) chain
COL3A1	Collagen alpha-1(III) chain
COL4A1	Collagen alpha-1(IV) chain
COL4A2	Collagen alpha-2(IV) chain
COL5A1	Collagen alpha-1(V) chain
COL5A2	Collagen alpha-2(V) chain
COL6A1	Collagen alpha-1(VI) chain
COL6A2	Collagen alpha-2(VI) chain
COL6A3	Collagen alpha-3(VI) chain
COL8A1	Collagen alpha-1(VIII) chain
COLEC12	Collectin-12
COMP	Cartilage oligomeric matrix protein
CORO1B	Coronin-1B
CORO1C	Coronin
COTL1	Coactosin-like protein
CPA4	Carboxypeptidase A4
CPE	Carboxypeptidase E
CPPED1	Serine/threonine-protein phosphatase CPPED1
CPQ	Carboxypeptidase Q
CREG1	Protein CREG1
CRIM1	Cysteine-rich motor neuron 1 protein
CRK	Adapter molecule crk
CRKL	Crk-like protein
CSF1	Macrophage colony-stimulating factor 1
CSPG4	Chondroitin sulfate proteoglycan 4
CSRP1	Cysteine and glycine-rich protein 1
CST2	Cystatin-SA
CST3	Cystatin-C
CST6	Cystatin-M
CSTB	Cystatin-B
CTBS	Di-N-acetylchitobiase
CTGF	Connective tissue growth factor
CTHRC1	Collagen triple helix repeat-containing protein 1
CTSA	Carboxypeptidase
CTSB	Cathepsin B
CTSC	Dipeptidyl peptidase 1
CTSD	Cathepsin D
CTSL	Cathepsin L1
CTSZ	Cathepsin Z
CTTN	Src substrate cortactin
CUTA	Protein CutA
CXCL1	Growth-regulated alpha protein
CXCL3	C-X-C motif chemokine 3
CXCL8	C-X-C motif chemokine
CYB5R3	NADH-cytochrome b5 reductase 3
CYR61	Protein CYR61
DAB2IP	Disabled homolog 2-interacting protein
DAG1	Dystroglycan
DCBLD2	Discoidin, CUB and LCCL domain-containing protein 2
DCD	Dermcidin
DCN	Decorin
DCTN2	Dynactin subunit 2
DDAH1	N(G),N(G)-dimethylarginine dimethylaminohydrolase 1
DDB1	DNA damage-binding protein 1
DDT	D-dopachrome decarboxylase
DDX39A	ATP-dependent RNA helicase DDX39A
DKK1	Dickkopf-related protein 1
DKK3	Dickkopf-related protein 3
DNAJC13	DnaJ homolog subfamily C member 13
DNASE2	Deoxyribonuclease-2-alpha
DPP7	Dipeptidyl peptidase 2
DPT	Dermatopontin
DPYSL2	Dihydropyrimidinase-related protein 2
DSC1	Desmocollin-1
DSG1	Desmoglein-1
DSP	Desmoplakin
DST	Dystonin
DSTN	Destrin
DUSP13	Dual specificity protein phosphatase 13 isoform B
ECM1	Extracellular matrix protein 1
ECM2	Extracellular matrix protein 2
EEF1A1	Elongation factor 1-alpha 1
EEF1B2	Elongation factor 1-beta
EEF1D	Elongation factor 1-delta
EEF1G	Elongation factor 1-gamma
EEF2	Elongation factor 2
EFEMP1	EGF-containing fibulin-like extracellular matrix protein 1
EFEMP2	EGF-containing fibulin-like extracellular matrix protein 2
EIF4A2	Eukaryotic initiation factor 4A-II
EIF5A	Eukaryotic translation initiation factor 5A
ELN	Elastin
EMILIN1	EMILIN-1
EMILIN2	EMILIN-2
ENG	Endoglin
ENO1	Alpha-enolase
ENPP2	Ectonucleotide pyrophosphatase/phosphodiesterase family member 2
EPDR1	Mammalian ependymin-related protein 1
ERH	Enhancer of rudimentary homolog
ERP29	Endoplasmic reticulum resident protein 29
ERP44	Endoplasmic reticulum resident protein 44
EXT1	Exostosin-1
EXT2	Exostosin-2
EZR	Ezrin
FAM120A	Constitutive coactivator of PPAR-gamma-like protein 1
FAM20C	Extracellular serine/threonine protein kinase FAM20C
FAM3C	Protein FAM3C
FAP	Prolyl endopeptidase FAP
FAT3	Protocadherin Fat 3
FBLN1	Fibulin-1
FBLN1	Fibulin-1
FBLN2	Fibulin-2
FBLN5	Fibulin-5
FBN1	Fibrillin-1
FHL1	Four and a half LIM domains protein 1
FKBP10	Peptidyl-prolyl cis-trans isomerase FKBP10
FKBP1A	Peptidyl-prolyl cis-trans isomerase
FKBP2	Peptidyl-prolyl cis-trans isomerase FKBP2
FKBP9	Peptidyl-prolyl cis-trans isomerase FKBP9
FLNA	Filamin-A
FLNB	Filamin-B
FLNC	Filamin-C
FLRT2	Leucine-rich repeat transmembrane protein FLRT2
FMOD	Fibromodulin
FN1	Fibronectin
FRAS1	Extracellular matrix protein FRAS1
FSCN1	Fascin
FST	Follistatin
FSTL1	Follistatin-related protein 1
FSTL3	Follistatin-related protein 3
FUCA1	Tissue alpha-L-fucosidase
FUCA2	Plasma alpha-L-fucosidase
GALNS	N-acetylgalactosamine-6-sulfatase
GALNT2	Polypeptide N-acetylgalactosaminyltransferase 2
GALNT5	Polypeptide N-acetylgalactosaminyltransferase 5
GANAB	Neutral alpha-glucosidase AB
GAPDH	Glyceraldehyde-3-phosphate dehydrogenase
GAS6	Growth arrest-specific protein 6
GBA	Glucosylceramidase
GBE1	1,4-alpha-glucan-branching enzyme
GDI1	Rab GDP dissociation inhibitor alpha
GDI2	Rab GDP dissociation inhibitor beta
GGH	Gamma-glutamyl hydrolase
GLA	Alpha-galactosidase A
GLB1	Beta-galactosidase
GLO1	Lactoylglutathione lyase
GLOD4	Glyoxalase domain-containing protein 4
GM2A	Ganglioside GM2 activator
GNS	N-acetylglucosamine-6-sulfatase
GOLM1	Golgi membrane protein 1
GOT1	Aspartate aminotransferase, cytoplasmic
GOT2	Aspartate aminotransferase, mitochondrial
GPC1	Glypican-1
GPI	Glucose-6-phosphate isomerase
GREM1	Gremlin-1
GRN	Granulins
GSN	Gelsolin
GSR	Glutathione reductase, mitochondrial
GSS	Glutathione synthetase
GSTM2	Glutathione S-transferase Mu 2
GSTO1	Glutathione S-transferase omega-1
GSTP1	Glutathione S-transferase P
GYG1	Glycogenin-1
HAGH	Hydroxyacylglutathione hydrolase, mitochondrial
HAPLN1	Hyaluronan and proteoglycan link protein 1
HAPLN3	Hyaluronan and proteoglycan link protein 3
HBA2	Hemoglobin subunit alpha
HDHD2	Haloacid dehalogenase-like hydrolase domain-containing protein 2
HEBP2	Heme-binding protein 2
HEXA	Beta-hexosaminidase
HEXB	Beta-hexosaminidase subunit beta
HIST1H2AJ	Histone H2A type 1-J
HIST1H2BN	Histone H2B
HIST1H4A	Histone H4
HIST2H3PS2	Histone H3
HLA-G	HLA class I histocompatibility antigen, alpha chain G
HNRNPA2B1	Heterogeneous nuclear ribonucleoproteins A2/B1
HNRNPK	Heterogeneous nuclear ribonucleoprotein K
HP	Haptoglobin
HSP90AA1	Heat shock protein HSP 90-alpha
HSP90AB1	Heat shock protein HSP 90-beta
HSP90AB2P	Putative heat shock protein HSP 90-beta 2
HSP90B1	Endoplasmin
HSPA13	Heat shock 70 kDa protein 13
HSPA1A	Heat shock 70 kDa protein 1A
HSPA4	Heat shock 70 kDa protein 4
HSPA5	78 kDa glucose-regulated protein
HSPA6	Heat shock 70 kDa protein 6
HSPA8	Heat shock cognate 71 kDa protein
HSPB1	Heat shock protein beta-1
HSPE1	10 kDa heat shock protein, mitochondrial
HSPG2	Basement membrane-specific heparan sulfate proteoglycan core protein
HTRA1	Serine protease HTRA1
IDH1	Isocitrate dehydrogenase [NADP] cytoplasmic
IGF2	Insulin-like growth factor II
IGFBP2	Insulin-like growth factor-binding protein 2
IGFBP3	Insulin-like growth factor-binding protein 3
IGFBP4	Insulin-like growth factor-binding protein 4
IGFBP5	Insulin-like growth factor-binding protein 5
IGFBP6	Insulin-like growth factor-binding protein 6
IGFBP7	Insulin-like growth factor-binding protein 7
IL6	Interleukin-6
ILF3	Interleukin enhancer-binding factor 3
IMPA1	Inositol monophosphatase 1
INHBA	Inhibin beta A chain
IPO5	Importin-5
IQGAP1	Ras GTPase-activating-like protein IQGAP1
ISLR	Immunoglobulin superfamily containing leucine-rich repeat protein
ITGBL1	Integrin beta-like protein 1
ITIH5	Inter-alpha-trypsin inhibitor heavy chain H5
JUP	Junction plakoglobin
KATNAL2	Katanin p60 ATPase-containing subunit A-like 2
KPNB1	Importin subunit beta-1
KPRP	Keratinocyte proline-rich protein
LAMA1	Laminin subunit alpha-1
LAMA2	Laminin subunit alpha-2
LAMA4	Laminin subunit alpha-4
LAMB1	Laminin subunit beta-1
LAMB2	Laminin subunit beta-2
LAMC1	Laminin subunit gamma-1
LAMP1	Lysosome-associated membrane glycoprotein 1
LAMP2	Lysosome-associated membrane glycoprotein 2
LAP3	Cytosol aminopeptidase
LASP1	LIM and SH3 domain protein 1
LDHA	L-lactate dehydrogenase A chain
LDHB	L-lactate dehydrogenase B chain
LEPR	Leptin receptor
LGALS1	Galectin-1
LGALS3	Galectin-3
LGALS3BP	Galectin-3-binding protein
LMNA	Prelamin-A/C
LOX	Protein-lysine 6-oxidase
LOXL1	Lysyl oxidase homolog 1
LOXL2	Lysyl oxidase homolog 2
LOXL3	Lysyl oxidase homolog 3
LRP1	Prolow-density lipoprotein receptor-related protein 1
LRRCC1	Leucine-rich repeat and coiled-coil domain-containing protein 1
LTA4H	Leukotriene A-4 hydrolase
LTBP1	Latent-transforming growth factor beta-binding protein 1
LTBP2	Latent-transforming growth factor beta-binding protein 2
LUM	Lumican
LY96	Lymphocyte antigen 96
MAN1A1	Mannosyl-oligosaccharide 1,2-alpha-mannosidase IA
MAN2A1	Alpha-mannosidase 2
MAN2B1	Lysosomal alpha-mannosidase
MAN2B2	Alpha-mannosidase
MANBA	Beta-mannosidase
MAP1B	Microtubule-associated protein 1B
MAP4	Microtubule-associated protein
MARCKS	Myristoylated alanine-rich C-kinase substrate
MASP1	Mannan-binding lectin serine protease 1
MAT2A	S-adenosylmethionine synthase isoform type-2
MAT2B	Methionine adenosyltransferase 2 subunit beta
MDH1	Malate dehydrogenase, cytoplasmic
MDH2	Malate dehydrogenase, mitochondrial
MFAP2	Microfibrillar-associated protein 2
MFAP4	Microfibril-associated glycoprotein 4
MFAP5	Microfibrillar-associated protein 5
MFGE8	Lactadherin
MIF	Macrophage migration inhibitory factor
MINPP1	Multiple inositol polyphosphate phosphatase 1
MIOS	WD repeat-containing protein mio
MMP1	Interstitial collagenase
MMP2	72 kDa type IV collagenase
MMP3	Stromelysin-1
MOXD1	DBH-like monooxygenase protein 1
MRC2	C-type mannose receptor 2
MSH3	DNA mismatch repair protein Msh3
MSN	Moesin
MXRA5	Matrix-remodeling-associated protein 5
MXRA8	Matrix-remodeling-associated protein 8
MYDGF	Myeloid-derived growth factor
MYH7	Myosin-7
MYH9	Myosin-9
MYL1	Myosin light chain 1/3, skeletal muscle isoform
MYL12A	Myosin regulatory light chain 12A
MYL6	Myosin light polypeptide 6
NAGA	Alpha-N-acetylgalactosaminidase
NAGK	N-acetyl-D-glucosamine kinase
NAGLU	Alpha-N-acetylglucosaminidase
NAP1L1	Nucleosome assembly protein 1-like 1
NCL	Nucleolin
NEDD8	NEDD8
NELFA	Negative elongation factor A
NENF	Neudesin
NES	Nestin
NFASC	Neurofascin
NID1	Nidogen-1
NID2	Nidogen-2
NME1	Nucleoside diphosphate kinase A
NME1-NME2	Nucleoside diphosphate kinase
NOV	Protein NOV homolog
NPC2	Epididymal secretory protein E1
NPEPPS	Puromycin-sensitive aminopeptidase
NRP1	Neuropilin-1
NSFL1C	NSFL1 cofactor p47
NUCB1	Nucleobindin-1
NUCB2	Nucleobindin-2
OAF	Out at first protein homolog
OLFML3	Olfactomedin-like protein 3
OTUB1	Ubiquitin thioesterase OTUB1
OXSR1	Serine/threonine-protein kinase OSR1
P3H1	Prolyl 3-hydroxylase 1
P4HB	Protein disulfide-isomerase
PAM	Peptidyl-glycine alpha-amidating monooxygenase
PAMR1	Inactive serine protease PAMR1
PAPPA	Pappalysin-1
PARK7	Protein deglycase DJ-1
PCOLCE	Procollagen C-endopeptidase enhancer 1
PCSK2	Neuroendocrine convertase 2
PDCD1LG2	Programmed cell death 1 ligand 2
PDCD5	Programmed cell death protein 5
PDE3A	cGMP-inhibited 3,5-cyclic phosphodiesterase A
PDGFD	Platelet-derived growth factor D
PDGFRB	Platelet-derived growth factor receptor beta
PDIA3	Protein disulfide-isomerase A3
PDIA3	Protein disulfide-isomerase A3
PDIA4	Protein disulfide-isomerase A4
PDIA6	Protein disulfide-isomerase A6
PDLIM7	PDZ and LIM domain protein 7
PEA15	Astrocytic phosphoprotein PEA-15
PEBP1	Phosphatidylethanolamine-binding protein 1
PEPD	Xaa-Pro dipeptidase
PFDN4	Prefoldin subunit 4
PFN1	Profilin-1
PGAM1	Phosphoglycerate mutase 1
PGK1	Phosphoglycerate kinase 1
PGLS	6-phosphogluconolactonase
PGM1	Phosphoglucomutase-1
PI16	Peptidase inhibitor 16
PIK3CB	Phosphatidylinositol 4,5-bisphosphate 3-kinase catalytic subunit beta isoform
PKM	Pyruvate kinase PKM
PLAUR	Urokinase plasminogen activator surface receptor
PLBD2	Putative phospholipase B-like 2
PLD3	Phospholipase D3
PLEC	Plectin
PLOD1	Procollagen-lysine,2-oxoglutarate 5-dioxygenase 1
PLOD2	Procollagen-lysine,2-oxoglutarate 5-dioxygenase 2
PLOD3	Procollagen-lysine,2-oxoglutarate 5-dioxygenase 3
PLS3	Plastin-3
PNP	Purine nucleoside phosphorylase
PODN	Podocan
POFUT2	GDP-fucose protein O-fucosyltransferase 2
POSTN	Periostin
PPIA	Peptidyl-prolyl cis-trans isomerase A
PPIB	Peptidyl-prolyl cis-trans isomerase B
PPP1R7	Protein phosphatase 1 regulatory subunit 7
PRCP	Lysosomal Pro-X carboxypeptidase
PRDX1	Peroxiredoxin-1
PRDX2	Peroxiredoxin-2
PRDX3	Thioredoxin-dependent peroxide reductase, mitochondrial
PRDX4	Peroxiredoxin-4
PRDX5	Peroxiredoxin-5, mitochondrial
PRDX6	Peroxiredoxin-6
PRELP	Prolargin
PRG2	Bone marrow proteoglycan
PRKCSH	Glucosidase 2 subunit beta
PRNP	Major prion protein
PROCR	Endothelial protein C receptor
PROS1	Vitamin K-dependent protein S
PRSS23	Serine protease 23
PSAP	Prosaposin
PSAT1	Phosphoserine aminotransferase
PSG1	Pregnancy-specific beta-1-glycoprotein 1
PSG4	Pregnancy-specific beta-1-glycoprotein 4
PSG5	Pregnancy-specific beta-1-glycoprotein 5
PSMA1	Proteasome subunit alpha type-1
PSMA2	Proteasome subunit alpha type
PSMA3	Proteasome subunit alpha type-3
PSMA4	Proteasome subunit alpha type
PSMA5	Proteasome subunit alpha type-5
PSMA6	Proteasome subunit alpha type
PSMA7	Proteasome subunit alpha type-7
PSMB1	Proteasome subunit beta type-1
PSMB2	Proteasome subunit beta type-2
PSMB3	Proteasome subunit beta type-3
PSMB5	Proteasome subunit beta type-5
PSMB6	Proteasome subunit beta type-6
PSMC5	26S protease regulatory subunit 8
PSMD7	26S proteasome non-ATPase regulatory subunit 7
PSMD9	26S proteasome non-ATPase regulatory subunit 9
PTGDS	Prostaglandin-H2 D-isomerase
PTK7	Inactive tyrosine-protein kinase 7
PTMA	Prothymosin alpha
PTMS	Parathymosin
PTPRG	Receptor-type tyrosine-protein phosphatase gamma
PTPRK	Protein-tyrosine-phosphatase
PTRF	Polymerase I and transcript release factor
PTX3	Pentraxin-related protein PTX3
PVR	Poliovirus receptor
PXDN	Peroxidasin homolog
QPCT	Glutaminyl-peptide cyclotransferase
QSOX1	Sulfhydryl oxidase 1
RAB8B	Ras-related protein Rab-1A
RAD23B	UV excision repair protein RAD23 homolog B
RARRES1	Retinoic acid receptor responder protein 1
RARRES2	Retinoic acid receptor responder protein 2
RBP4	Retinol-binding protein 4
RCN1	Reticulocalbin-1
RCN3	Reticulocalbin-3
RDX	Radixin
RECK	Reversion-inducing cysteine-rich protein with Kazal motifs
RNASE4	Ribonuclease 4
RNASET2	Ribonuclease T2
RNH1	Ribonuclease inhibitor
RNPEP	Aminopeptidase B
RPL10A	60S ribosomal protein L10a
RPL12	60S ribosomal protein L12
RPL5	60S ribosomal protein L5
RPLP0	60S acidic ribosomal protein P0-like
RPLP1	60S acidic ribosomal protein P1
RPLP2	60S acidic ribosomal protein P2
RPS12	40S ribosomal protein S12
RPS16	40S ribosomal protein S16
RPS25	40S ribosomal protein S25
RPS28	40S ribosomal protein S28
RPS9	40S ribosomal protein S9
RPSA	40S ribosomal protein SA
RRBP1	Ribosome-binding protein 1
S100A10	Protein S100-A10
S100A11	Protein S100-A11
S100A13	Protein S100-A13
S100A4	Protein S100-A4
S100A6	Protein S100
S100A7	Protein S100-A7
S100A8	Protein S100-A8
S100A9	Protein S100-A9
SDCBP	Syntenin-1
SDF4	45 kDa calcium-binding protein
SEC24A	Protein transport protein Sec24A
SELENBP1	Selenium-binding protein 1
SELM	Selenoprotein M
SEMA7A	Semaphorin-7A
SEPT2	Septin-2
SERPINA1	Alpha-1-antitrypsin
SERPINB1	Leukocyte elastase inhibitor
SERPINB2	Plasminogen activator inhibitor 2
SERPINB6	Serpin B6
SERPINB7	Serpin B7
SERPINE1	Plasminogen activator inhibitor 1
SERPINE2	Glia-derived nexin
SERPINF1	Pigment epithelium-derived factor
SERPING1	Plasma protease C1 inhibitor
SERPINH1	Serpin H1
SET	Protein SET
SFRP1	Secreted frizzled-related protein 1
SH3BGRL	SH3 domain-binding glutamic acid-rich-like protein
SH3BGRL3	SH3 domain-binding glutamic acid-rich-like protein 3
SIL1	Nucleotide exchange factor SIL1
SLC3A2	4F2 cell-surface antigen heavy chain
SLIT2	Slit homolog 2 protein
SLIT3	Slit homolog 3 protein
SMPD1	Sphingomyelin phosphodiesterase
SOD1	Superoxide dismutase [Cu-Zn]
SOD3	Extracellular superoxide dismutase [Cu-Zn]
SPARC	SPARC
SPOCK1	Testican-1
SPON1	Spondin-1
SPON2	Spondin-2
SPTAN1	Spectrin alpha chain, non-erythrocytic 1
SPTBN1	Spectrin beta chain, non-erythrocytic 1
SRPX	Sushi repeat-containing protein SRPX
SSC5D	Soluble scavenger receptor cysteine-rich domain-containing protein SSC5D
STAB1	Stabilin-1
STAM	Signal transducing adapter molecule 1
STC1	Stanniocalcin-1
STC2	Stanniocalcin-2
STMN1	Stathmin
STON2	Stonin-2
STXBP5	Syntaxin-binding protein 5
SUMF2	Sulfatase-modifying factor 2
SUMO3	Small ubiquitin-related modifier 2
SVEP1	Sushi, von Willebrand factor type A, EGF and pentraxin domain-containing protein 1
TAGLN	Transgelin
TAGLN2	Transgelin-2
TALDO1	Transaldolase
TARS	Threonine--tRNA ligase, cytoplasmic
TBCA	Tubulin-specific chaperone A
TCHH	Trichohyalin
TFPI	Tissue factor pathway inhibitor
TGFBI	Transforming growth factor-beta-induced protein ig-h3
TGFBR3	Transforming growth factor beta receptor type 3
THBS1	Thrombospondin-1
THBS2	Thrombospondin-2
THBS3	Thrombospondin-3
THY1	Thy-1 membrane glycoprotein
TIMP1	Metalloproteinase inhibitor 1
TIMP2	Metalloproteinase inhibitor 2
TKT	Transketolase
TLN1	Talin-1
TMSB10	Thymosin beta-10
TMSB4X	Thymosin beta-4
TNC	Tenascin
TNFAIP6	Tumor necrosis factor-inducible gene 6 protein
TNFRSF12A	Tumor necrosis factor receptor superfamily member 12A
TNNT1	Troponin T, slow skeletal muscle
TNNT3	Troponin T, fast skeletal muscle
TNXB	Tenascin-X
TP53I3	Quinone oxidoreductase PIG3
TPI1	Triosephosphate isomerase
TPM1	Tropomyosin alpha-1 chain
TPM2	Tropomyosin beta chain
TPM3	Tropomyosin alpha-3 chain
TPM4	Tropomyosin alpha-4 chain
TPP1	Tripeptidyl-peptidase 1
TSN	Translin
TSPYL2	Testis-specific Y-encoded-like protein 2
TTC28	Tetratricopeptide repeat protein 28
TTN	Titin
TUBA1B	Tubulin alpha-1B chain
TUBB	Tubulin beta chain
TWSG1	Twisted gastrulation protein homolog 1
TXN	Thioredoxin
TXNDC17	Thioredoxin domain-containing protein 17
TXNDC5	Thioredoxin domain-containing protein 5
TXNRD1	Thioredoxin reductase 1, cytoplasmic
UBA1	Ubiquitin-like modifier-activating enzyme 1
UBB	Ubiquitin-60S ribosomal protein L40
UBE2L3	Ubiquitin-conjugating enzyme E2 L3
UBE2NL	Putative ubiquitin-conjugating enzyme E2 N-like
UBN2	Ubinuclein-2
UCHL1	Ubiquitin carboxyl-terminal hydrolase isozyme L1
UFM1	Ubiquitin-fold modifier 1
UGGT1	UDP-glucose:glycoprotein glucosyltransferase 1
ULBP2	NKG2D ligand 2
UNKL	Putative E3 ubiquitin-protein ligase UNKL
USP34	Ubiquitin carboxyl-terminal hydrolase
VASN	Vasorin
VCAN	Versican core protein
VCL	Vinculin
VCP	Transitional endoplasmic reticulum ATPase
VIM	Vimentin
VNN1	Pantetheinase
VPS26A	Vacuolar protein sorting-associated protein 26A
WARS	Tryptophan--tRNA ligase, cytoplasmic
WDR1	WD repeat-containing protein 1
WISP2	WNT1-inducible-signaling pathway protein 2
XYLT1	Xylosyltransferase 1
XYLT2	Xylosyltransferase 2
YWHAB	14-3-3 protein beta/alpha
YWHAE	14-3-3 protein epsilon
YWHAG	14-3-3 protein gamma
YWHAH	14-3-3 protein eta
YWHAZ	14-3-3 protein zeta/delta
ZNF292	Zinc finger protein 292
ZNF638	Zinc finger protein 638
ZNF662	Zinc finger protein 662

## Sheet: Filtered proteins
Table S2: Proteins present in at least 65% of samples per group
Protein description	Protein ID UniProt	Protein names	Student's T-test p-value	Student's T-test q-value	Fold change (log2) hEDS vs CTR	Fold change
Collagen alpha-2(I) chain	P08123	COL1A2	0.139214	0.204786	-0.434654	0.739871
Collagen alpha-1(VI) chain	P12109	COL6A1	0.305969	0.370737	-0.250643	0.840522
Laminin subunit alpha-4	Q16363	LAMA4	0.667641	0.730598	0.337815	1.26384
Gelsolin	P06396	GSN	0.27268	0.346028	-0.221046	0.857943
Complement C1r subcomponent	P00736	C1R	0.0860547	0.138612	-0.505603	0.704366
Thrombospondin-2	P35442	THBS2	0.00222261	0.00885714	-0.389293	0.763504
Insulin-like growth factor-binding protein 3	P17936	IGFBP3	0.0103564	0.024	1.64517	3.12785
Polyubiquitin-B	J3QS39	UBB	0.713923	0.760158	-0.0659639	0.955307
Prosaposin	C9JIZ6	PSAP	0.000246625	0.00222222	0.68219	1.60457
Collagen alpha-1(XII) chain	D6RGG3	COL12A1	0.0334664	0.0657647	0.640563	1.55894
Tetranectin	E9PHK0	CLEC3B	0.0984132	0.153412	-1.46011	0.363465
Heat shock cognate 71 kDa protein	E9PKE3	HSPA8	0.674493	0.724889	0.101784	1.0731
Puromycin-sensitive aminopeptidase	E9PLK3	NPEPPS	0.670906	0.727837	0.098162	1.07041
Dickkopf-related protein 3	F6SYF8	DKK3	0.0200794	0.0412903	1.03006	2.04211
Laminin subunit beta-1	G3XAI2	LAMB1	0.421344	0.489619	0.318236	1.24681
Cartilage oligomeric matrix protein	G3XAP6	COMP	0.121773	0.189923	-0.663145	0.6315
CD44 antigen	H0YDX6	CD44	0.927054	0.946128	0.0186295	1.013
Calmodulin 2	P0DP24	CALM2	0.306485	0.366649	-0.221184	0.857861
Sulfhydryl oxidase 1	O00391	QSOX1	0.16937	0.238467	0.520306	1.43426
Immunoglobulin superfamily containing leucine-rich repeat protein	O14498	ISLR	0.00367365	0.0125	-0.628817	0.646706
Alpha-actinin-4	O43707	ACTN4	0.53151	0.61173	0.132282	1.09603
Calumenin	O43852	CALU	0.00435538	0.0126667	1.13945	2.20297
Calsyntenin-1	O94985	CLSTN1	0.17111	0.236656	-0.239495	0.847042
L-lactate dehydrogenase A chain	P00338	LDHA	0.0494943	0.0891282	0.539192	1.45316
Phosphoglycerate kinase 1	P00558	PGK1	0.269171	0.346229	0.272251	1.20769
Metalloproteinase inhibitor 1	Q5H9A7	TIMP1	0.731935	0.774353	-0.105668	0.929375
Collagen alpha-1(I) chain	P02452	COL1A1	0.00290729	0.0106667	-0.486359	0.713824
Collagen alpha-1(III) chain	P02461	COL3A1	0.000494787	0.0036	-0.815986	0.56802
Prelamin-A/C	Q3BDU5	LMNA	0.000730705	0.00363636	1.37911	2.60108
Fibronectin	P02751	FN1	0.0080096	0.0192727	1.2888	2.44325
Interstitial collagenase	P03956	MMP1	5.8049e-05	0.0016	5.72868	53.0279
Fructose-bisphosphate aldolase A	P04075	ALDOA	0.540137	0.616044	0.215242	1.1609
Plasminogen activator inhibitor 1	P05121	SERPINE1	0.812276	0.835698	0.0921941	1.06599
Plasma protease C1 inhibitor	P05155	SERPING1	0.0041732	0.0122353	-0.827781	0.563395
Collagen alpha-2(V) chain	P05997	COL5A2	6.67323e-05	0.00114286	-1.22015	0.429238
Alpha-enolase	P06733	ENO1	0.0210198	0.042	1.10072	2.14462
Glia-derived nexin	P07093	SERPINE2	0.632481	0.715527	0.18851	1.13959
L-lactate dehydrogenase B chain	P07195	LDHB	0.149361	0.214828	0.280041	1.21423
Protein disulfide-isomerase	P07237	P4HB	0.00669063	0.0161905	0.619911	1.53678
Annexin A2	P07355	ANXA2	0.951844	0.956649	0.0161765	1.01128
Decorin	P07585	DCN	0.64521	0.7176	-0.241307	0.845979
Beta-hexosaminidase subunit beta	P07686	HEXB	2.18702e-07	0	0.931589	1.90738
Profilin-1	P07737	PFN1	0.252542	0.330235	0.24487	1.18499
Cathepsin B	P07858	CTSB	0.0533779	0.0958	0.89985	1.86587
Thrombospondin-1	P07996	THBS1	0.200661	0.276381	0.453729	1.36958
72 kDa type IV collagenase	P08253	MMP2	0.367947	0.43725	0.415896	1.33413
Vimentin	P08670	VIM	0.338061	0.400861	0.259383	1.19697
Annexin A5	P08758	ANXA5	0.219162	0.291152	0.201516	1.14991
Galectin-1	P09382	LGALS1	6.02005e-05	0.00133333	1.21099	2.31496
SPARC	P09486	SPARC	0.277315	0.347444	-0.387075	0.764678
Macrophage colony-stimulating factor 1	P09603	CSF1	0.0475533	0.0874737	0.604419	1.52037
Complement C1s subcomponent	P09871	C1S	0.481584	0.549364	-0.213414	0.862494
Thioredoxin	P10599	TXN	0.300133	0.366827	-0.249335	0.841284
Clusterin	P10909	CLU	0.268901	0.350841	0.420674	1.33855
78 kDa glucose-regulated protein	P11021	HSPA5	0.00151346	0.00676923	1.05947	2.08417
Laminin subunit gamma-1	P11047	LAMC1	0.642469	0.721191	-0.143903	0.905067
Collagen alpha-2(VI) chain	P12110	COL6A2	0.376613	0.438683	-0.271401	0.828515
Collagen alpha-3(VI) chain	P12111	COL6A3	0.0132237	0.0297778	0.695673	1.61964
Versican core protein	P13611	VCAN	0.424291	0.487153	-0.303702	0.810171
Macrophage migration inhibitory factor	P14174	MIF	0.285161	0.354247	0.232459	1.17484
Nidogen-1	P14543	NID1	0.889877	0.913222	-0.0380816	0.973949
Pyruvate kinase PKM	P14618	PKM	0.0391336	0.0732222	1.03575	2.05018
Aminopeptidase N	P15144	ANPEP	0.0603114	0.108293	0.632835	1.55061
Metalloproteinase inhibitor 2	P16035	TIMP2	0.00599079	0.0154	-0.652725	0.636078
Vinculin	P18206	VCL	0.00536497	0.0149474	-0.615973	0.65249
Collagen alpha-1(V) chain	P20908	COL5A1	0.335419	0.401949	0.236995	1.17854
Filamin-A	Q60FE5	FLNA	0.542405	0.613187	0.211551	1.15793
Biglycan	P21810	BGN	0.0259289	0.0517576	0.600304	1.51604
Nucleoside diphosphate kinase	Q32Q12	NME1-NME2	0.0468037	0.0888649	-0.443117	0.735544
Insulin-like growth factor-binding protein 4	P22692	IGFBP4	0.149009	0.218316	0.390873	1.31119
Peptidyl-prolyl cis-trans isomerase B	P23284	PPIB	0.0192532	0.0408	0.488186	1.40268
Cofilin-1	P23528	CFL1	0.0103606	0.0230769	0.531196	1.44513
Insulin-like growth factor-binding protein 6	P24592	IGFBP6	0.210896	0.283569	-0.419081	0.747901
Pentraxin-related protein PTX3	P26022	PTX3	1.91712e-05	0.004	-0.760788	0.590174
Moesin	P26038	MSN	0.700242	0.75028	0.0789901	1.05628
Transketolase	P29401	TKT	0.742564	0.779883	0.106919	1.07693
Phosphatidylethanolamine-binding protein 1	P30086	PEBP1	0.373846	0.440346	-0.209758	0.864682
Protein disulfide-isomerase A3	P30101	PDIA3	0.0168531	0.0366897	1.05826	2.08242
Fibrillin-1	P35555	FBN1	0.0658172	0.111636	0.758621	1.69187
Mannan-binding lectin serine protease 1	P48740	MASP1	0.463346	0.530851	-0.442428	0.735895
Serpin H1	P50454	SERPINH1	0.000229458	0.002	2.63114	6.19515
Lumican	P51884	LUM	0.150423	0.212339	-0.619996	0.650673
Laminin subunit beta-2	P55268	LAMB2	0.79043	0.819238	-0.206827	0.866441
Cadherin-13	P55290	CDH13	0.758754	0.790846	-0.117635	0.921697
Triosephosphate isomerase	P60174	TPI1	0.393504	0.456145	-0.203048	0.868713
Actin, cytoplasmic 2	P63261	ACTG1	0.219691	0.287642	-0.260479	0.834811
Beta-2-microglobulin	P61769	B2M	0.00889281	0.0217391	-0.64482	0.639573
14-3-3 protein epsilon	P62258	YWHAE	0.062147	0.108952	-0.293177	0.816103
Peptidyl-prolyl cis-trans isomerase A	P62937	PPIA	0.64604	0.711542	0.08978	1.06421
14-3-3 protein zeta/delta	P63104	YWHAZ	0.127648	0.196906	-0.639222	0.642059
Tropomyosin alpha-4 chain	P67936	TPM4	0.435087	0.496651	0.160432	1.11762
Basement membrane-specific heparan sulfate proteoglycan core protein	P98160	HSPG2	0.0139991	0.0314286	-0.562912	0.676934
Nucleobindin-1	Q02818	NUCB1	0.00962595	0.0226667	0.609017	1.52522
Prolow-density lipoprotein receptor-related protein 1	Q07954	LRP1	3.51576e-05	0.00266667	1.05229	2.07382
Galectin-3-binding protein	Q08380	LGALS3BP	0.0767436	0.124255	-0.539387	0.688063
EGF-containing fibulin-like extracellular matrix protein 1	Q12805	EFEMP1	0.199878	0.279548	-0.231429	0.851791
Follistatin-related protein 1	Q12841	FSTL1	0.088594	0.13976	-0.353266	0.78281
Ectonucleotide pyrophosphatase/phosphodiesterase family member 2	Q13822	ENPP2	0.980957	0.979143	0.00806061	1.0056
Periostin	Q15063	POSTN	0.57065	0.642174	-0.848676	0.555294
Transforming growth factor-beta-induced protein ig-h3	Q15582	TGFBI	4.09646e-05	0.002	1.72958	3.31631
Insulin-like growth factor-binding protein 7	Q16270	IGFBP7	0.0623965	0.107349	-1.3819	0.383713
Extracellular matrix protein 1	Q16610	ECM1	0.210115	0.286375	-0.38659	0.764935
SH3 domain-binding glutamic acid-rich-like protein 3	Q5T123	SH3BGRL3	0.0781604	0.125667	-0.453934	0.730049
Vasorin	Q6EMK4	VASN	0.0714987	0.11687	0.338957	1.26484
CD109 antigen	Q6YHK3	CD109	0.13039	0.193673	0.551628	1.46574
Thioredoxin domain-containing protein 5	Q8NBS9	TXNDC5	0.000749362	0.00333333	0.628496	1.54595
45 kDa calcium-binding protein	Q9BRK5	SDF4	0.948169	0.961491	0.0144435	1.01006
Endosialin	Q9HCU0	CD248	0.298105	0.368486	-0.245098	0.843758
Cathepsin Z	Q9UBR2	CTSZ	0.838834	0.860785	-0.0418559	0.971405
C-type lectin domain family 11 member A	Q9Y240	CLEC11A	0.0665146	0.110578	-0.299222	0.812691
Phosphoserine aminotransferase	Q9Y617	PSAT1	0.0388146	0.0748571	-0.565109	0.675904
Carboxypeptidase Q	Q9Y646	CPQ	0.128388	0.194296	0.219131	1.16403
In bold the 32 differentailly expressed proteins following the application of Student’s t-test and an FDR adjusted p-value < 0.05
In blue significant uncorrected p-values
