# Supplementary material for: Matrix Metalloproteinases Inhibition by Doxycycline Rescues Extracellular Matrix Organization and Partly Reverts Myofibroblast Differentiation in Hypermobile Ehlers-Danlos Syndrome Dermal Fibroblasts: A Potential Therapeutic Target?
Source: Cells. 2021 Nov 19;10(11):3236. doi: 10.3390/cells10113236 (PMC8621259; doi:10.3390/cells10113236)
Supplement: Supplementary file 1 [file cells-10-03236-s001.zip › Table S3.xlsx]

## Sheet: PANTHER protein families
Table S3: PANTHER classification of protein families
Protein protein class	DEPs identied in the secretome of hEDS myofibroblasts
extracellular matrix protein (PC00102)	HSPG2, COL5A2, COL1A1, COL6A3, LGALS1, COL3A1
chaperone (PC00072)	PPIB, TXNDC5, P4HB, PDIA3
protein-binding activity modulator (PC00095)	TIMP2, IGFBP3, SERPINH1, SERPING1
cell adhesion molecule (PC00069)	ISLR, TGFBI
calcium-binding protein (PC00060)	NUCB1, CALU
metabolite interconversion enzyme (PC00262)	HEXB, ENO1
protein modifying enzyme (PC00260)	MMP1
transporter (PC00227)	PSAP
scaffold/adaptor protein (PC00226)	PSAP
transfer/carrier protein (PC00219)	LRP1
defense/immunity protein (PC00090)	B2M
cytoskeletal protein (PC00085)	CFL1
intercellular signal molecule (PC00207)	FN1
gene-specific transcriptional regulator (PC00264)	PTX3
Proteins with an increased expression are highlighted in bold

## Sheet: GO_Biological Process
Table S3: Gene Ontology enrichment analysis for biological process
Term	Count	%	p-value	Proteins	Fold Enrichment	Bonferroni	Benjamini	FDR
GO:0030198~extracellular matrix organization	7	21.875	1.1014e-06	COL1A1, COL3A1, COL5A2, FN1, COL6A3, TGFBI, HSPG2	19.3456	0.000364496	0.000322487	0.000313719
GO:0044267~cellular protein metabolic process	6	18.75	1.94856e-06	MMP1, HEXB, IGFBP3, TGFBI, B2M, HSPG2	27.5429	0.000644767	0.000322487	0.000313719
GO:0030574~collagen catabolic process	5	15.625	4.88107e-06	COL1A1, COL3A1, MMP1, COL5A2, COL6A3	42.3185	0.00161433	0.000538544	0.000523901
GO:0002576~platelet degranulation	5	15.625	3.23622e-05	ISLR, PSAP, FN1, SERPING1, VCL	26.295	0.0106549	0.00267797	0.00260516
GO:0030199~collagen fibril organization	4	12.5	4.50286e-05	COL1A1, COL3A1, COL5A2, SERPINH1	55.5567	0.0147943	0.00298089	0.00289984
GO:0007155~cell adhesion	7	21.875	0.000137211	COL1A1, ISLR, FN1, COL6A3, TGFBI, THBS2, VCL	8.26088	0.044404	0.00756948	0.00736367
GO:0022617~extracellular matrix disassembly	4	12.5	0.000331274	MMP1, TIMP2, FN1, HSPG2	28.5093	0.10387	0.0156645	0.0152386
GO:0010951~negative regulation of endopeptidase activity	4	12.5	0.00128554	TIMP2, SERPINH1, SERPING1, COL6A3	17.9067	0.346745	0.0531892	0.051743
GO:0001501~skeletal system development	4	12.5	0.00183576	COL1A1, COL3A1, HEXB, COL5A2	15.8154	0.455668	0.0675152	0.0656794
GO:0010977~negative regulation of neuron projection development	3	9.375	0.002786	LGALS1, LRP1, B2M	36.9326	0.602854	0.0875223	0.0851425
GO:0007568~aging	4	12.5	0.00311272	COL3A1, LRP1, TIMP2, SERPING1	13.1316	0.643676	0.0875223	0.0851425
GO:0071230~cellular response to amino acid stimulus	3	9.375	0.00317301	COL1A1, COL3A1, COL5A2	34.5752	0.650739	0.0875223	0.0851425
GO:0034976~response to endoplasmic reticulum stress	3	9.375	0.00789693	PDIA3, P4HB, TXNDC5	21.6671	0.927507	0.196431	0.19109
GO:0045454~cell redox homeostasis	3	9.375	0.00830826	PDIA3, P4HB, TXNDC5	21.1043	0.936805	0.196431	0.19109
GO:0043410~positive regulation of MAPK cascade	3	9.375	0.00915931	IGFBP3, PSAP, TIMP2	20.0621	0.952437	0.202115	0.19662
GO:0032964~collagen biosynthetic process	2	6.25	0.0106732	COL1A1, SERPINH1	180.559	0.971328	0.207814	0.202163
GO:0044794~positive regulation by host of viral process	2	6.25	0.0106732	CFL1, PPIB	180.559	0.971328	0.207814	0.202163
GO:0046598~positive regulation of viral entry into host cell	2	6.25	0.0124413	LGALS1, P4HB	154.765	0.984139	0.228782	0.222562
GO:0042493~response to drug	4	12.5	0.0166234	COL1A1, LGALS1, TIMP2, B2M	7.12733	0.996107	0.289597	0.281723
GO:0050900~leukocyte migration	3	9.375	0.0199442	COL1A1, MMP1, FN1	13.3199	0.998729	0.330076	0.321102
GO:0034975~protein folding in endoplasmic reticulum	2	6.25	0.0229861	PDIA3, HSPA5	83.335	0.999546	0.35594	0.346262
GO:0014912~negative regulation of smooth muscle cell migration	2	6.25	0.024733	LRP1, IGFBP3	77.3825	0.999749	0.35594	0.346262
GO:0010812~negative regulation of cell-substrate adhesion	2	6.25	0.024733	COL1A1, LGALS1	77.3825	0.999749	0.35594	0.346262
GO:0043277~apoptotic cell clearance	2	6.25	0.0264768	LRP1, TXNDC5	72.2237	0.999861	0.365159	0.355231
GO:0050776~regulation of immune response	3	9.375	0.0400318	COL1A1, COL3A1, B2M	9.12939	0.999999	0.530021	0.515609
GO:0002474~antigen processing and presentation of peptide antigen via MHC class I	2	6.25	0.0522754	PDIA3, B2M	36.1118	1	0.640857	0.623432
GO:0034504~protein localization to nucleus	2	6.25	0.0522754	COL1A1, LMNA	36.1118	1	0.640857	0.623432
GO:0043588~skin development	2	6.25	0.0590426	COL3A1, COL5A2	31.8634	1	0.683582	0.664995
GO:0001525~angiogenesis	3	9.375	0.0598909	FN1, TGFBI, HSPG2	7.28714	1	0.683582	0.664995
GO:0042157~lipoprotein metabolic process	2	6.25	0.0657631	LRP1, HSPG2	28.5093	1	0.725586	0.705857
GO:0006687~glycosphingolipid metabolic process	2	6.25	0.0774125	HEXB, PSAP	24.0746	1	0.826565	0.804091
GO:0018149~peptide cross-linking	2	6.25	0.0856474	COL3A1, FN1	21.6671	1	0.865676	0.842138
GO:0030178~negative regulation of Wnt signaling pathway	2	6.25	0.0889214	LRP1, DKK3	20.8337	1	0.865676	0.842138
GO:0034097~response to cytokine	2	6.25	0.0889214	COL3A1, TIMP2	20.8337	1	0.865676	0.842138
GO:0021987~cerebral cortex development	2	6.25	0.0954355	COL3A1, LRP1	19.3456	1	0.897202	0.872807
GO:0006606~protein import into nucleus	2	6.25	0.0986756	PDIA3, CFL1	18.6785	1	0.897202	0.872807

## Sheet: GO_Molecular Function
Table S3: Gene Ontology enrichment analysis for molecular function
Term	Count	%	p-value	Proteins	Fold Enrichment	Bonferroni	Benjamini	FDR
GO:0005178~integrin binding	5	15.625	2.97779e-05	COL3A1, TIMP2, FN1, TGFBI, P4HB	26.7952	0.00237943	0.00238223	0.00217379
GO:0005518~collagen binding	4	12.5	0.000146046	SERPINH1, FN1, TGFBI, PPIB	37.5133	0.0116165	0.00584184	0.00533068
GO:0005515~protein binding	25	78.125	0.000584721	LRP1, ENO1, THBS2, LGALS1, PSAP, LMNA, CFL1, TIMP2, B2M, TXNDC5, PDIA3, HSPA5, IGFBP3, FN1, HSPG2, COL1A1, COL3A1, CALU, SERPING1, NUCB1, PTX3, TGFBI, P4HB, PPIB, VCL	1.60131	0.0457135	0.01031	0.00940785
GO:0016853~isomerase activity	3	9.375	0.000586418	PDIA3, P4HB, TXNDC5	80.3857	0.0458432	0.01031	0.00940785
GO:0003756~protein disulfide isomerase activity	3	9.375	0.000644373	PDIA3, P4HB, TXNDC5	76.7318	0.0502595	0.01031	0.00940785
GO:0005509~calcium ion binding	7	21.875	0.0011816	LRP1, HSPA5, MMP1, CALU, NUCB1, THBS2, HSPG2	5.49358	0.0902484	0.0157546	0.0143761
GO:0001948~glycoprotein binding	3	9.375	0.0055429	LGALS1, HSPA5, B2M	25.9708	0.358961	0.0587951	0.0536505
GO:0005201~extracellular matrix structural constituent	3	9.375	0.00587951	COL1A1, COL3A1, COL5A2	25.1955	0.37609	0.0587951	0.0536505
GO:0044822~poly(A) RNA binding	7	21.875	0.0110957	PDIA3, LGALS1, LRP1, SERPINH1, ENO1, P4HB, PPIB	3.48884	0.590418	0.0942113	0.0859678
GO:0004867~serine-type endopeptidase inhibitor activity	3	9.375	0.011994	SERPINH1, SERPING1, COL6A3	17.4031	0.619139	0.0942113	0.0859678
GO:0002020~protease binding	3	9.375	0.0129541	LRP1, TIMP2, FN1	16.7139	0.647638	0.0942113	0.0859678
GO:0051082~unfolded protein binding	3	9.375	0.0152325	HSPA5, SERPINH1, PPIB	15.3464	0.707117	0.10155	0.0926647
GO:0048407~platelet-derived growth factor binding	2	6.25	0.018741	COL1A1, COL3A1	102.309	0.779864	0.115329	0.105238
GO:0046332~SMAD binding	2	6.25	0.0713522	COL3A1, COL5A2	26.1721	0.99732	0.407727	0.372051
GO:0098641~cadherin binding involved in cell-cell adhesion	3	9.375	0.0881858	HSPA5, ENO1, VCL	5.82103	0.99938	0.470324	0.429171

## Sheet: GO_Cellular Component
Table S3: Gene Ontology enrichment analysis for cellular component
Term	Count	%	p-value	Proteins	Fold Enrichment	Bonferroni	Benjamini	FDR
GO:0031012~extracellular matrix	15	46.875	1.33019e-17	HSPA5, MMP1, FN1, THBS2, HSPG2, COL1A1, COL3A1, LGALS1, LMNA, COL5A2, CFL1, TIMP2, COL6A3, TGFBI, P4HB	28.8598	1.46321e-15	1.46321e-15	1.31689e-15
GO:0005615~extracellular space	19	59.375	3.17204e-13	HEXB, IGFBP3, FN1, ENO1, HSPG2, DKK3, COL1A1, COL3A1, LGALS1, CFL1, PSAP, TIMP2, SERPINH1, SERPING1, COL6A3, NUCB1, PTX3, TGFBI, B2M	8.03304	3.4891e-11	1.3401e-11	1.20609e-11
GO:0005576~extracellular region	20	62.5	4.30114e-13	MMP1, IGFBP3, FN1, THBS2, HSPG2, DKK3, COL1A1, COL3A1, ISLR, COL5A2, PSAP, TIMP2, CALU, SERPING1, COL6A3, PTX3, TGFBI, P4HB, B2M, VCL	7.07453	4.7311e-11	1.3401e-11	1.20609e-11
GO:0005788~endoplasmic reticulum lumen	11	34.375	4.87309e-13	PDIA3, COL1A1, COL3A1, HSPA5, COL5A2, SERPINH1, COL6A3, P4HB, PPIB, B2M, TXNDC5	32.6276	5.36005e-11	1.3401e-11	1.20609e-11
GO:0070062~extracellular exosome	22	68.75	7.69211e-11	PDIA3, HSPA5, HEXB, IGFBP3, FN1, ENO1, HSPG2, ISLR, LGALS1, CFL1, PSAP, TIMP2, SERPINH1, SERPING1, COL6A3, NUCB1, TGFBI, P4HB, PPIB, B2M, VCL, TXNDC5	4.45713	8.46132e-09	1.69226e-09	1.52304e-09
GO:0005925~focal adhesion	9	28.125	2.14089e-07	PDIA3, LRP1, HSPA5, CFL1, P4HB, PPIB, B2M, HSPG2, VCL	13.1087	2.35495e-05	3.92496e-06	3.53247e-06
GO:0005581~collagen trimer	6	18.75	4.49988e-07	COL1A1, COL3A1, MMP1, COL5A2, SERPINH1, COL6A3	37.1413	4.94975e-05	7.07124e-06	6.36411e-06
GO:0005793~endoplasmic reticulum-Golgi intermediate compartment	5	15.625	5.16976e-06	HSPA5, SERPINH1, FN1, NUCB1, P4HB	41.875	0.000568514	6.31984e-05	5.68786e-05
GO:0005578~proteinaceous extracellular matrix	7	21.875	5.17078e-06	LGALS1, MMP1, COL5A2, TIMP2, FN1, COL6A3, TGFBI	14.875	0.000568625	6.31984e-05	5.68786e-05
GO:0042470~melanosome	5	15.625	2.4924e-05	PDIA3, HSPA5, CALU, P4HB, PPIB	28.1931	0.00273792	0.000274164	0.000246748
GO:0034663~endoplasmic reticulum chaperone complex	3	9.375	0.000152558	HSPA5, P4HB, PPIB	155.318	0.0166426	0.00152558	0.00137302
GO:0043202~lysosomal lumen	4	12.5	0.00040053	HEXB, PSAP, HSPG2, TXNDC5	26.8	0.0431103	0.00367153	0.00330438
GO:0005623~cell	4	12.5	0.000644512	PDIA3, P4HB, VCL, TXNDC5	22.78	0.0684629	0.00545357	0.00490821
GO:0005783~endoplasmic reticulum	7	21.875	0.00239887	PDIA3, HSPA5, SERPINH1, CALU, P4HB, PPIB, TXNDC5	4.81461	0.232175	0.0188483	0.0169635
GO:0031093~platelet alpha granule lumen	3	9.375	0.00393161	ISLR, FN1, SERPING1	31.0636	0.351653	0.0288318	0.0259486
GO:0005604~basement membrane	3	9.375	0.00795312	TGFBI, THBS2, HSPG2	21.6266	0.584528	0.0546777	0.0492099
GO:0005790~smooth endoplasmic reticulum	2	6.25	0.0433287	HSPA5, PPIB	43.8077	0.992346	0.280362	0.252326
GO:0009986~cell surface	4	12.5	0.0635858	PDIA3, LGALS1, HSPA5, TIMP2	4.20295	0.999273	0.38858	0.349722
GO:0016020~membrane	8	25	0.0721896	HSPA5, HEXB, CFL1, CALU, NUCB1, ENO1, PPIB, B2M	2.07091	0.999737	0.41794	0.376146
GO:1903561~extracellular vesicle	2	6.25	0.081708	COL6A3, VCL	22.78	0.999915	0.449394	0.404455
