# Supplementary material for: Matrix Metalloproteinases Inhibition by Doxycycline Rescues Extracellular Matrix Organization and Partly Reverts Myofibroblast Differentiation in Hypermobile Ehlers-Danlos Syndrome Dermal Fibroblasts: A Potential Therapeutic Target?
Source: Cells. 2021 Nov 19;10(11):3236. doi: 10.3390/cells10113236 (PMC8621259; doi:10.3390/cells10113236)
Supplement: Supplementary file 1 [file cells-10-03236-s001.zip › Table S4.xlsx]

## Sheet: KEGG pathway analysis
	Table S4: KEGG pathway analysis
	Term	Count	%	p-value	Proteins	Fold Enrichment	Bonferroni	Benjamini	FDR
	hsa04512:ECM-receptor interaction	7	21.875	1.60256e-07	COL1A1, COL3A1, COL5A2, FN1, COL6A3, THBS2, HSPG2	25.1583	7.69227e-06	7.6923e-06	7.21153e-06
	hsa04510:Focal adhesion	7	21.875	2.49773e-05	COL1A1, COL3A1, COL5A2, FN1, COL6A3, THBS2, VCL	10.6251	0.00119821	0.000599454	0.000561988
	hsa05146:Amoebiasis	5	15.625	0.000260513	COL1A1, COL3A1, COL5A2, FN1, VCL	14.7491	0.0124284	0.0041682	0.00390769
	hsa04974:Protein digestion and absorption	4	12.5	0.00227757	COL1A1, COL3A1, COL5A2, COL6A3	14.2128	0.103671	0.0273308	0.0256226
	hsa04151:PI3K-Akt signaling pathway	6	18.75	0.0032219	COL1A1, COL3A1, COL5A2, FN1, COL6A3, THBS2	5.43794	0.1435	0.0309302	0.0289971
	hsa04141:Protein processing in endoplasmic reticulum	4	12.5	0.0139939	PDIA3, HSPA5, P4HB, TXNDC5	7.40075	0.491582	0.111951	0.104954
	hsa04611:Platelet activation	3	9.375	0.058901	COL1A1, COL3A1, COL5A2	7.21573	0.945738	0.403893	0.378649

## Sheet: Functional annotation 
	Table S4: DAVID Functional annotation clustering
	Annotation Cluster 1	Enrichment Score: 12.022664911244359
	Category	Term	Count	%	p-value	Proteins	Fold Enrichment	Bonferroni	Benjamini	FDR
	UP_SEQ_FEATURE	signal peptide	27	84.375	3.77516e-16	LRP1, HEXB, THBS2, ISLR, PSAP, TIMP2, SERPINH1, B2M, TXNDC5, PDIA3, HSPA5, MMP1, IGFBP3, FN1, HSPG2, DKK3, COL1A1, COL3A1, COL5A2, CALU, SERPING1, COL6A3, NUCB1, PTX3, TGFBI, P4HB, PPIB	5.05922	1.37224e-13	1.55914e-13	1.52139e-13
	UP_KEYWORDS	Signal	27	84.375	4.81127e-14	LRP1, HEXB, THBS2, ISLR, PSAP, TIMP2, SERPINH1, B2M, TXNDC5, PDIA3, HSPA5, MMP1, IGFBP3, FN1, HSPG2, DKK3, COL1A1, COL3A1, COL5A2, CALU, SERPING1, COL6A3, NUCB1, PTX3, TGFBI, P4HB, PPIB	4.17433	6.00908e-12	6.01409e-12	5.2924e-12
	GOTERM_CC_DIRECT	GO:0005576~extracellular region	20	62.5	4.30114e-13	MMP1, IGFBP3, FN1, THBS2, HSPG2, DKK3, COL1A1, COL3A1, ISLR, COL5A2, PSAP, TIMP2, CALU, SERPING1, COL6A3, PTX3, TGFBI, P4HB, B2M, VCL	7.07453	4.7311e-11	1.3401e-11	1.20609e-11
	UP_SEQ_FEATURE	disulfide bond	21	65.625	2.80582e-10	PDIA3, LRP1, MMP1, HEXB, IGFBP3, FN1, THBS2, HSPG2, DKK3, COL1A1, COL3A1, ISLR, PSAP, TIMP2, SERPING1, COL6A3, PTX3, TGFBI, P4HB, B2M, TXNDC5	4.51366	1.156e-07	5.79402e-08	5.65373e-08
	UP_KEYWORDS	Disulfide bond	22	68.75	3.51428e-10	PDIA3, LRP1, MMP1, HEXB, IGFBP3, FN1, THBS2, HSPG2, DKK3, COL1A1, COL3A1, ISLR, COL5A2, PSAP, TIMP2, SERPING1, COL6A3, PTX3, TGFBI, P4HB, B2M, TXNDC5	4.1204	4.39286e-08	1.46429e-08	1.28857e-08
	Annotation Cluster 2	Enrichment Score: 4.121675214513049
	Category	Term	Count	%	p-value	Proteins	Fold Enrichment	Bonferroni	Benjamini	FDR
	UP_KEYWORDS	Extracellular matrix	9	28.125	3.36402e-09	COL1A1, COL3A1, LGALS1, MMP1, COL5A2, FN1, COL6A3, TGFBI, HSPG2	22.4357	4.20503e-07	1.05126e-07	9.25106e-08
	KEGG_PATHWAY	hsa04512:ECM-receptor interaction	7	21.875	1.60256e-07	COL1A1, COL3A1, COL5A2, FN1, COL6A3, THBS2, HSPG2	25.1583	7.69227e-06	7.6923e-06	7.21153e-06
	UP_SEQ_FEATURE	short sequence motif:Cell attachment site	6	18.75	2.65918e-07	COL1A1, COL5A2, FN1, COL6A3, TGFBI, THBS2	41.3386	0.000109552	2.74561e-05	2.67913e-05
	UP_KEYWORDS	Collagen	6	18.75	3.40131e-07	COL1A1, COL3A1, MMP1, COL5A2, SERPINH1, COL6A3	39.3769	4.25155e-05	8.50327e-06	7.48288e-06
	GOTERM_CC_DIRECT	GO:0005581~collagen trimer	6	18.75	4.49988e-07	COL1A1, COL3A1, MMP1, COL5A2, SERPINH1, COL6A3	37.1413	4.94975e-05	7.07124e-06	6.36411e-06
	GOTERM_BP_DIRECT	GO:0030198~extracellular matrix organization	7	21.875	1.1014e-06	COL1A1, COL3A1, COL5A2, FN1, COL6A3, TGFBI, HSPG2	19.3456	0.000364496	0.000322487	0.000313719
	UP_SEQ_FEATURE	domain:VWFC	4	12.5	2.68304e-06	COL1A1, COL3A1, COL5A2, THBS2	139.326	0.0011048	0.000221619	0.000216253
	GOTERM_BP_DIRECT	GO:0030574~collagen catabolic process	5	15.625	4.88107e-06	COL1A1, COL3A1, MMP1, COL5A2, COL6A3	42.3185	0.00161433	0.000538544	0.000523901
	GOTERM_CC_DIRECT	GO:0005578~proteinaceous extracellular matrix	7	21.875	5.17078e-06	LGALS1, MMP1, COL5A2, TIMP2, FN1, COL6A3, TGFBI	14.875	0.000568625	6.31984e-05	5.68786e-05
	KEGG_PATHWAY	hsa04510:Focal adhesion	7	21.875	2.49773e-05	COL1A1, COL3A1, COL5A2, FN1, COL6A3, THBS2, VCL	10.6251	0.00119821	0.000599454	0.000561988
	UP_KEYWORDS	Calcium	9	28.125	3.46491e-05	COL1A1, COL3A1, LRP1, MMP1, COL5A2, CALU, NUCB1, THBS2, HSPG2	6.60024	0.00432185	0.000481237	0.000423489
	INTERPRO	IPR001007:von Willebrand factor, type C	4	12.5	4.30892e-05	COL1A1, COL3A1, COL5A2, THBS2	56.5823	0.00490023	0.00245609	0.00234836
	GOTERM_BP_DIRECT	GO:0030199~collagen fibril organization	4	12.5	4.50286e-05	COL1A1, COL3A1, COL5A2, SERPINH1	55.5567	0.0147943	0.00298089	0.00289984
	UP_SEQ_FEATURE	propeptide:C-terminal propeptide	3	9.375	6.43219e-05	COL1A1, COL3A1, COL5A2	235.113	0.0261534	0.00379499	0.0037031
	SMART	SM00214:VWC	4	12.5	6.7279e-05	COL1A1, COL3A1, COL5A2, THBS2	47.2714	0.00275473	0.00275844	0.00275844
	UP_SEQ_FEATURE	glycosylation site:O-linked (Gal...)	3	9.375	8.26199e-05	COL1A1, COL3A1, COL6A3	208.99	0.033468	0.00426115	0.00415797
	UP_SEQ_FEATURE	domain:Fibrillar collagen NC1	3	9.375	0.000125982	COL1A1, COL3A1, COL5A2	170.991	0.0505836	0.00473005	0.00461552
	GOTERM_BP_DIRECT	GO:0007155~cell adhesion	7	21.875	0.000137211	COL1A1, ISLR, FN1, COL6A3, TGFBI, THBS2, VCL	8.26088	0.044404	0.00756948	0.00736367
	INTERPRO	IPR000885:Fibrillar collagen, C-terminal	3	9.375	0.000147125	COL1A1, COL3A1, COL5A2	158.173	0.0166336	0.00559076	0.00534555
	UP_KEYWORDS	Ehlers-Danlos syndrome	3	9.375	0.000197568	COL1A1, COL3A1, COL5A2	137.819	0.0243959	0.0024696	0.00217325
	SMART	SM00038:COLFI	3	9.375	0.000248271	COL1A1, COL3A1, COL5A2	119.253	0.0101287	0.00508956	0.00508956
	KEGG_PATHWAY	hsa05146:Amoebiasis	5	15.625	0.000260513	COL1A1, COL3A1, COL5A2, FN1, VCL	14.7491	0.0124284	0.0041682	0.00390769
	INTERPRO	IPR008160:Collagen triple helix repeat	4	12.5	0.000341763	COL1A1, COL3A1, COL5A2, COL6A3	28.2912	0.0382182	0.00824299	0.00788146
	UP_KEYWORDS	Hydroxylation	4	12.5	0.000389932	COL1A1, COL3A1, COL5A2, COL6A3	27.0803	0.0475817	0.00406179	0.00357437
	UP_SEQ_FEATURE	region of interest:Triple-helical region	3	9.375	0.000572858	COL1A1, COL3A1, COL6A3	81.7785	0.210287	0.0197159	0.0192385
	GOTERM_BP_DIRECT	GO:0001501~skeletal system development	4	12.5	0.00183576	COL1A1, COL3A1, HEXB, COL5A2	15.8154	0.455668	0.0675152	0.0656794
	KEGG_PATHWAY	hsa04974:Protein digestion and absorption	4	12.5	0.00227757	COL1A1, COL3A1, COL5A2, COL6A3	14.2128	0.103671	0.0273308	0.0256226
	GOTERM_BP_DIRECT	GO:0071230~cellular response to amino acid stimulus	3	9.375	0.00317301	COL1A1, COL3A1, COL5A2	34.5752	0.650739	0.0875223	0.0851425
	KEGG_PATHWAY	hsa04151:PI3K-Akt signaling pathway	6	18.75	0.0032219	COL1A1, COL3A1, COL5A2, FN1, COL6A3, THBS2	5.43794	0.1435	0.0309302	0.0289971
	UP_KEYWORDS	Cell adhesion	5	15.625	0.0055414	FN1, COL6A3, TGFBI, THBS2, VCL	6.71353	0.500727	0.0461783	0.0406369
	GOTERM_MF_DIRECT	GO:0005201~extracellular matrix structural constituent	3	9.375	0.00587951	COL1A1, COL3A1, COL5A2	25.1955	0.37609	0.0587951	0.0536505
	KEGG_PATHWAY	hsa04611:Platelet activation	3	9.375	0.058901	COL1A1, COL3A1, COL5A2	7.21573	0.945738	0.403893	0.378649
	GOTERM_MF_DIRECT	GO:0046872~metal ion binding	5	15.625	0.482858	COL1A1, COL3A1, IGFBP3, COL5A2, TIMP2	1.35984	1	1	0.924051
	Annotation Cluster 3	Enrichment Score: 3.682479186320895
	Category	Term	Count	%	p-value	Proteins	Fold Enrichment	Bonferroni	Benjamini	FDR
	GOTERM_CC_DIRECT	GO:0005788~endoplasmic reticulum lumen	11	34.375	4.87309e-13	PDIA3, COL1A1, COL3A1, HSPA5, COL5A2, SERPINH1, COL6A3, P4HB, PPIB, B2M, TXNDC5	32.6276	5.36005e-11	1.3401e-11	1.20609e-11
	UP_SEQ_FEATURE	short sequence motif:Prevents secretion from ER	7	21.875	4.25862e-10	PDIA3, HSPA5, SERPINH1, CALU, P4HB, PPIB, TXNDC5	71.9472	1.75455e-07	5.8627e-08	5.72075e-08
	GOTERM_CC_DIRECT	GO:0042470~melanosome	5	15.625	2.4924e-05	PDIA3, HSPA5, CALU, P4HB, PPIB	28.1931	0.00273792	0.000274164	0.000246748
	INTERPRO	IPR005788:Disulphide isomerase	3	9.375	2.69178e-05	PDIA3, P4HB, TXNDC5	347.981	0.00306396	0.00245609	0.00234836
	UP_SEQ_FEATURE	domain:Thioredoxin 1	3	9.375	0.000103175	PDIA3, P4HB, TXNDC5	188.091	0.0416196	0.00426115	0.00415797
	UP_SEQ_FEATURE	domain:Thioredoxin 2	3	9.375	0.000103175	PDIA3, P4HB, TXNDC5	188.091	0.0416196	0.00426115	0.00415797
	GOTERM_CC_DIRECT	GO:0034663~endoplasmic reticulum chaperone complex	3	9.375	0.000152558	HSPA5, P4HB, PPIB	155.318	0.0166426	0.00152558	0.00137302
	INTERPRO	IPR017937:Thioredoxin, conserved site	3	9.375	0.000361535	PDIA3, P4HB, TXNDC5	102.347	0.0403843	0.00824299	0.00788146
	GOTERM_MF_DIRECT	GO:0016853~isomerase activity	3	9.375	0.000586418	PDIA3, P4HB, TXNDC5	80.3857	0.0458432	0.01031	0.00940785
	GOTERM_MF_DIRECT	GO:0003756~protein disulfide isomerase activity	3	9.375	0.000644373	PDIA3, P4HB, TXNDC5	76.7318	0.0502595	0.01031	0.00940785
	GOTERM_CC_DIRECT	GO:0005623~cell	4	12.5	0.000644512	PDIA3, P4HB, VCL, TXNDC5	22.78	0.0684629	0.00545357	0.00490821
	INTERPRO	IPR013766:Thioredoxin domain	3	9.375	0.00212611	PDIA3, P4HB, TXNDC5	42.4367	0.215442	0.0403961	0.0386244
	GOTERM_CC_DIRECT	GO:0005783~endoplasmic reticulum	7	21.875	0.00239887	PDIA3, HSPA5, SERPINH1, CALU, P4HB, PPIB, TXNDC5	4.81461	0.232175	0.0188483	0.0169635
	UP_KEYWORDS	Redox-active center	3	9.375	0.00247075	PDIA3, P4HB, TXNDC5	39.3769	0.265985	0.0237572	0.0209064
	UP_KEYWORDS	Endoplasmic reticulum	7	21.875	0.00461906	PDIA3, HSPA5, SERPINH1, CALU, P4HB, PPIB, TXNDC5	4.21939	0.439384	0.0412416	0.0362926
	GOTERM_BP_DIRECT	GO:0034976~response to endoplasmic reticulum stress	3	9.375	0.00789693	PDIA3, P4HB, TXNDC5	21.6671	0.927507	0.196431	0.19109
	GOTERM_BP_DIRECT	GO:0045454~cell redox homeostasis	3	9.375	0.00830826	PDIA3, P4HB, TXNDC5	21.1043	0.936805	0.196431	0.19109
	KEGG_PATHWAY	hsa04141:Protein processing in endoplasmic reticulum	4	12.5	0.0139939	PDIA3, HSPA5, P4HB, TXNDC5	7.40075	0.491582	0.111951	0.104954
	UP_KEYWORDS	Isomerase	3	9.375	0.0144858	PDIA3, P4HB, PPIB	15.8153	0.838617	0.0982819	0.0864881
	GOTERM_MF_DIRECT	GO:0051082~unfolded protein binding	3	9.375	0.0152325	HSPA5, SERPINH1, PPIB	15.3464	0.707117	0.10155	0.0926647
	INTERPRO	IPR012336:Thioredoxin-like fold	3	9.375	0.0198287	PDIA3, P4HB, TXNDC5	13.3839	0.898041	0.226047	0.216132
	Annotation Cluster 4	Enrichment Score: 1.701823881486218
	Category	Term	Count	%	p-value	Proteins	Fold Enrichment	Bonferroni	Benjamini	FDR
	GOTERM_MF_DIRECT	GO:0005509~calcium ion binding	7	21.875	0.0011816	LRP1, HSPA5, MMP1, CALU, NUCB1, THBS2, HSPG2	5.49358	0.0902484	0.0157546	0.0143761
	UP_SEQ_FEATURE	domain:EGF-like 3	3	9.375	0.0061329	LRP1, THBS2, HSPG2	24.7488	0.920701	0.149814	0.146187
	UP_SEQ_FEATURE	domain:EGF-like 1	3	9.375	0.0147314	LRP1, THBS2, HSPG2	15.6742	0.997789	0.289718	0.282703
	INTERPRO	IPR001881:EGF-like calcium-binding	3	9.375	0.0189792	LRP1, THBS2, HSPG2	13.7	0.887457	0.226047	0.216132
	SMART	SM00179:EGF_CA	3	9.375	0.0309944	LRP1, THBS2, HSPG2	10.329	0.724972	0.423591	0.423591
	INTERPRO	IPR013032:EGF-like, conserved site	3	9.375	0.0434029	LRP1, THBS2, HSPG2	8.74325	0.993645	0.449811	0.430083
	UP_KEYWORDS	EGF-like domain	3	9.375	0.0497148	LRP1, THBS2, HSPG2	8.10701	0.998295	0.270189	0.237766
	INTERPRO	IPR000742:Epidermal growth factor-like domain	3	9.375	0.056643	LRP1, THBS2, HSPG2	7.53206	0.998703	0.461336	0.441102
	SMART	SM00181:EGF	3	9.375	0.0628773	LRP1, THBS2, HSPG2	6.97757	0.930232	0.639319	0.639319
	Annotation Cluster 5	Enrichment Score: 0.7587003495475111
	Category	Term	Count	%	p-value	Proteins	Fold Enrichment	Bonferroni	Benjamini	FDR
	INTERPRO	IPR013783:Immunoglobulin-like fold	5	15.625	0.0719498	ISLR, FN1, COL6A3, B2M, HSPG2	3.04926	0.999799	0.482487	0.461325
	UP_KEYWORDS	Immunoglobulin domain	3	9.375	0.198333	ISLR, B2M, HSPG2	3.53383	1	0.79973	0.703763
	INTERPRO	IPR007110:Immunoglobulin-like domain	3	9.375	0.371085	ISLR, B2M, HSPG2	2.25669	1	1	0.964602
	Annotation Cluster 6	Enrichment Score: 0.5564261652094998
	Category	Term	Count	%	p-value	Proteins	Fold Enrichment	Bonferroni	Benjamini	FDR
	GOTERM_MF_DIRECT	GO:0098641~cadherin binding involved in cell-cell adhesion	3	9.375	0.0881858	HSPA5, ENO1, VCL	5.82103	0.99938	0.470324	0.429171
	GOTERM_CC_DIRECT	GO:0005913~cell-cell adherens junction	3	9.375	0.104125	HSPA5, ENO1, VCL	5.28947	0.999994	0.545419	0.490877
	GOTERM_CC_DIRECT	GO:0005886~plasma membrane	7	21.875	0.733732	LRP1, HSPA5, TGFBI, ENO1, B2M, HSPG2, VCL	0.967362	1	1	0.908257
	UP_KEYWORDS	Cytoplasm	6	18.75	0.882678	LRP1, HSPA5, CFL1, NUCB1, ENO1, VCL	0.801274	1	1	0.887097
